# Supplementary material for: Estimating energy expenditure using accelerometers
Source: Springer Nature journal article supplement (doi:10.1007/s00421-006-0307-5), 2006-10-20
Supplement: 421_2006_307_MOESM14_ESM.pdf [file 421_2006_307_MOESM14_ESM.pdf]

Supplemental Figure 1. Bland-Altman plots depicting error scores (indirect calorimetry minus prediction equation) for (A) Actical single regression equation, (B) Actigraph Nichols VO<sub>2</sub> equation, (C) Actigraph Freedson MET equation, (D) Actigraph Yngve overground walking equation, (E) Actigraph Yngve Treadmill walking equation, (F) Actigraph Hendelman walking equation, (G) Actigraph Leenders equation, (H) Actigraph Heil equation, (I) Actigraph Hendelman lifestyle equation, (J) Actigraph Brooks overground walk kcal with body mass equation, (K) Actigraph Brooks overground walk METs with body mass equation, (L) Actigraph Brooks overground walk MET equation, (M) Actigraph Brooks overground walk kcal equation. Solid line represents mean difference, and dashed lines represent 95% prediction intervals of the individual error scores. Values below zero represent over-estimation and values above zero represent underestimation versus the criterion.

Online Supporting Material

Supplemental Table 1: Mean (SD) MET values for the Cosmed K4b<sup>2</sup>, 2 Actical equations, and AMP-331 during 18 structured activities.

|                                           | Measured METs | Actical Single<br>Regression equation | Actical 2- Regression<br>equation | AMP-331      |
|-------------------------------------------|---------------|---------------------------------------|-----------------------------------|--------------|
| Lying                                     | 0.93 (0.22)   | 0.97 (0.02)                           | 0.97 (0.02)                       | 1.50 (0.03)* |
| Computer Work                             | 1.02 (0.20)   | 0.91 (0.3)                            | 0.91 (0.03)                       | 1.50 (0.03)  |
| Standing                                  | 1.19 (0.26)   | 0.90 (0.00)                           | 0.9 (0.00)                        | 1.51 (0.04)* |
| Filing papers                             | 1.59 (0.32)   | 1.02 (0.28)*                          | 1.02 (0.28)*                      | 1.53 (0.08)  |
| Washing Dishes                            | 2.08 (0.27)   | 1.03 (0.18)*                          | 1.03 (0.18)*                      | 1.51 (0.06)* |
| Washing windows                           | 3.01 (0.54)   | 2.01 (0.50)*                          | 2.03 (0.54)*                      | 1.75 (0.31)* |
| Slow Walk (avg. 81 m·min <sup>-1</sup> )  | 3.49 (0.69)   | 4.35 (0.33)*                          | 4.28 (0.29)*                      | 3.33 (0.48)  |
| Vacuum                                    | 3.57 (0.51)   | 2.45 (0.43)*                          | 2.42 (0.44)*                      | 2.68 (0.39)* |
| Sweep/mop                                 | 3.57 (0.65)   | 2.37 (0.51)*                          | 2.41 (0.58)*                      | 2.39 (0.42)* |
| Raking grass/leaves                       | 4.07 (0.85)   | 2.97 (0.48)*                          | 3.31 (0.74)*                      | 2.70 (0.36)* |
| Fast Walk (avg. 103 m·min <sup>-1</sup> ) | 4.42 (0.95)   | 5.21 (0.41)*                          | 5.10 (0.40)*                      | 4.57 (0.98)  |
| Stationary Cycling (avg. 99 watts)        | 6.13 (1.53)   | 1.88 (0.93)*                          | 1.95 (1.08)*                      | 2.14 (0.67)* |
| Lawn Mowing                               | 6.14 (0.76)   | 3.91 (0.35)*                          | 4.22 (0.32)*                      | 2.88 (0.19)* |
| Ascending/Descending Stairs               | 6.40 (0.77)   | 4.35 (0.23)*                          | 4.26 (0.22)*                      | 2.83 (0.04)* |
| Racquetball                               | 6.81 (1.38)   | 4.34 (0.31)*                          | 4.30 (0.27)*                      | 3.00 (0.03)* |
| Basketball                                | 7.94 (1.05)   | 5.13 (0.37)*                          | 5.03 (0.37)*                      | 3.12 (0.15)* |
| Slow Run (avg. 159 m·min <sup>-1</sup> )  | 8.65 (1.32)   | 8.71 (0.63)                           | 8.54 (0.62)                       | 5.11 (1.40)* |
| Fast Run (avg. 189 m·min <sup>-1</sup> )  | 10.25 (1.74)  | 9.23 (0.72)*                          | 9.04 (0.71)*                      | 5.65 (1.56)* |
| Average for all activities                | 4.51 (2.85)   | 3.43 (2.48)*                          | 3.43 (2.43)*                      | 2.78 (1.38)* |

\* Significantly different from Cosmed K4b<sup>2</sup> (P < 0.05); avg. = average.

Supplemental Table 2: Mean (SD) MET values for the Cosmed K4b<sup>2</sup>, 3 Actigraph kcal equations (Freedson et al. kcal equation, and 2 Brooks et al. kcal equations), and 2 Actigraph lifestyle equations (Swartz et al. and Hendelman et al.).

|                                              | Measured METs | Actigraph Freedson Kcal equation | Actigraph Brooks kcal | Actigraph Brooks kcal with BM | Actigraph Swartz equation | Actigraph Hendelman Lifestyle equation |
|----------------------------------------------|---------------|----------------------------------|-----------------------|-------------------------------|---------------------------|----------------------------------------|
| Lying                                        | 0.93 (0.22)   | 1.86 (1.42)*                     | 2.85 (0.65)*          | 2.41 (0.15)*                  | 2.61 (0.00)*              | 2.92 (0.00)*                           |
| Computer Work                                | 1.02 (0.20)   | 1.87 (1.42)*                     | 2.85 (0.65)*          | 2.41 (0.15)*                  | 2.61 (0.01)*              | 2.92 (0.00)*                           |
| Standing                                     | 1.19 (0.26)   | 1.87 (1.42)*                     | 2.85 (0.65)*          | 2.41 (0.15)*                  | 2.61 (0.01)*              | 2.93 (0.01)*                           |
| Filing papers                                | 1.59 (0.32)   | 1.90 (1.43)                      | 2.86 (0.65)*          | 2.42 (0.16)*                  | 2.64 (0.07)*              | 2.94 (0.04)*                           |
| Washing Dishes                               | 2.08 (0.27)   | 1.79 (1.51)                      | 2.94 (0.70)*          | 2.43 (0.17)*                  | 2.67 (0.09)*              | 2.96 (0.06)*                           |
| Washing windows                              | 3.01 (0.54)   | 2.03 (1.51)*                     | 3.03 (0.71)           | 2.54 (0.18)*                  | 2.88 (0.18)               | 3.09 (0.11)                            |
| Slow Walk<br>(avg. 81 m·min <sup>-1</sup> )  | 3.49 (0.69)   | 4.51 (0.91)*                     | 4.09 (0.80)           | 3.77 (0.30)                   | 5.02 (0.48)*              | 4.36 (0.29)*                           |
| Vacuum                                       | 3.57 (0.51)   | 2.36 (1.38)*                     | 3.17 (0.78)*          | 2.70 (0.16)*                  | 3.15 (0.25)*              | 3.25 (0.15)*                           |
| Sweep/mop                                    | 3.57 (0.65)   | 2.26 (1.46)*                     | 3.13 (0.74)*          | 2.65 (0.18)*                  | 3.08 (0.24)*              | 3.20 (0.14)*                           |
| Raking grass/leaves                          | 4.07 (0.85)   | 2.58 (1.33)*                     | 3.25 (0.81)*          | 2.81 (0.19)*                  | 3.34 (0.32)*              | 3.36 (0.19)*                           |
| Fast Walk<br>(avg. 103 m·min <sup>-1</sup> ) | 4.42 (0.95)   | 5.91 (0.78)*                     | 4.64 (0.94)           | 4.44 (0.43)                   | 6.18 (0.57)*              | 5.05 (0.34)*                           |
| Stationary Cycling<br>(avg. 99 watts)        | 6.13 (1.53)   | 2.34 (1.49)*                     | 3.03 (0.63)*          | 2.64 (0.29)*                  | 3.08 (0.56)*              | 3.21 (0.33)*                           |
| Lawn Mowing                                  | 6.14 (0.76)   | 3.66 (1.43)*                     | 3.68 (0.78)*          | 3.33 (0.23)*                  | 4.32 (0.52)*              | 3.94 (0.31)*                           |
| Ascending/Descending Stairs                  | 6.40 (0.77)   | 4.46 (0.91)*                     | 3.87 (0.93)*          | 3.66 (0.30)*                  | 4.86 (0.46)*              | 4.26 (0.27)*                           |
| Racquetball                                  | 6.81 (1.38)   | 4.74 (1.06)*                     | 4.15 (0.97)*          | 3.87 (0.52)*                  | 5.16 (0.72)*              | 4.44 (0.43)*                           |
| Basketball                                   | 7.94 (1.05)   | 6.34 (0.93)*                     | 4.78 (1.05)*          | 4.64 (0.57)*                  | 6.52 (0.78)*              | 5.25 (0.46)*                           |
| Slow Run<br>(avg. 159 m·min <sup>-1</sup> )  | 8.65 (1.32)   | 8.93 (1.44)                      | 5.82 (1.27)*          | 5.89 (0.90)*                  | 8.70 (1.04)               | 6.55 (0.62)*                           |
| Fast Run<br>(avg. 189 m·min <sup>-1</sup> )  | 10.25 (1.74)  | 9.57 (2.37)*                     | 6.08 (1.56)*          | 6.20 (1.33)*                  | 9.20 (1.71)*              | 6.85 (1.02)*                           |
| Average for all activities                   | 4.51 (2.85)   | 3.86 (2.76)*                     | 3.73 (1.32)*          | 3.41 (1.26)*                  | 4.39 (2.13)*              | 3.98 (1.27)*                           |

\*Significantly different from Cosmed K4b<sup>2</sup> (P < 0.05); avg. = average; BM = body mass.

Supplemental Table 3: Mean (SD) MET values for the Cosmed K4b<sup>2</sup>, 9 Actigraph MET equations.

|                                              | Measured METs   | Actigraph Freedson MET equation | Actigraph Hendelman Walk equation | Actigraph Heil Equation | Actigraph Leenders equation | Actigraph Yngve TM walk equation | Actigraph Yngve OG walk equation | Actigraph Nichols vo2 equation | Actigraph Brooks OG walk | Actigraph Brooks OG walk with BM |
|----------------------------------------------|-----------------|---------------------------------|-----------------------------------|-------------------------|-----------------------------|----------------------------------|----------------------------------|--------------------------------|--------------------------|----------------------------------|
| Lying                                        | 0.93<br>(0.22)  | 1.44<br>(0.00)*                 | 1.60<br>(0.00)*                   | 1.52<br>(0.21)*         | 2.24<br>(0.00)*             | 1.14<br>(0.00)                   | 0.75<br>(0.00)                   | 1.73<br>(0.00)*                | 2.32<br>(0.00)*          | 2.42<br>(0.26)*                  |
| Computer Work                                | 1.02<br>(0.20)  | 1.44<br>(0.01)*                 | 1.60<br>(0.00)*                   | 1.53<br>(0.21)*         | 2.24<br>(0.00)*             | 1.14<br>(0.01)                   | 0.75<br>(0.01)                   | 1.73<br>(0.01)*                | 2.32<br>(0.00)*          | 2.42<br>(0.26)*                  |
| Standing                                     | 1.19<br>(0.26)  | 1.45<br>(0.02)*                 | 1.61<br>(0.01)*                   | 1.53<br>(0.21)*         | 2.25<br>(0.01)*             | 1.15<br>(0.02)                   | 0.76<br>(0.02)*                  | 1.74<br>(0.01)*                | 2.32<br>(0.01)*          | 2.43<br>(0.26)*                  |
| Filing papers                                | 1.59<br>(0.32)  | 1.48<br>(0.08)                  | 1.64<br>(0.07)                    | 1.55<br>(0.23)          | 2.27<br>(0.06)*             | 1.18<br>(0.09)*                  | 0.79<br>(0.09)*                  | 1.77<br>(0.08)                 | 2.34<br>(0.04)*          | 2.44<br>(0.24)*                  |
| Washing Dishes                               | 2.08<br>(0.27)  | 1.51<br>(0.11)*                 | 1.66<br>(0.09)*                   | 1.55<br>(0.21)*         | 2.30<br>(0.08)              | 1.21<br>(0.11)*                  | 0.83<br>(0.11)*                  | 1.80<br>(0.10)                 | 2.36<br>(0.05)           | 2.48<br>(0.26)*                  |
| Washing windows                              | 3.01<br>(0.54)  | 1.76<br>(0.21)*                 | 1.86<br>(0.17)*                   | 1.74<br>(0.24)*         | 2.48<br>(0.16)*             | 1.46<br>(0.22)*                  | 1.08<br>(0.22)*                  | 2.02<br>(0.19)*                | 2.47<br>(0.10)*          | 2.59<br>(0.24)*                  |
| Slow Walk<br>(avg. 81 m min <sup>-1</sup> )  | 3.49<br>(0.69)  | 4.24<br>(0.56)*                 | 3.85<br>(0.45)*                   | 3.67<br>(0.43)          | 4.35<br>(0.42)*             | 4.04<br>(0.58)*                  | 3.64<br>(0.58)                   | 4.29<br>(0.51)*                | 3.62<br>(0.26)           | 3.78<br>(0.29)                   |
| Vacuum                                       | 3.57<br>(0.51)  | 2.07<br>(0.29)*                 | 2.11<br>(0.23)*                   | 1.99<br>(0.27)*         | 2.72<br>(0.22)*             | 1.79<br>(0.30)*                  | 1.41<br>(0.30)*                  | 2.31<br>(0.26)*                | 2.62<br>(0.13)*          | 2.74<br>(0.27)*                  |
| Sweep/mop                                    | 3.57<br>(0.65)  | 1.99<br>(0.28)*                 | 2.04<br>(0.22)*                   | 1.92<br>(0.29)*         | 2.65<br>(0.21)*             | 1.70<br>(0.29)*                  | 1.32<br>(0.29)*                  | 2.23<br>(0.26)*                | 2.58<br>(0.13)*          | 2.70<br>(0.26)*                  |
| Raking grass/leaves                          | 4.07<br>(0.85)  | 2.28<br>(0.37)*                 | 2.28<br>(0.30)*                   | 2.15<br>(0.34)*         | 2.88<br>(0.28)*             | 2.01<br>(0.39)*                  | 1.62<br>(0.38)*                  | 2.50<br>(0.34)*                | 2.71<br>(0.17)*          | 2.84<br>(0.28)*                  |
| Fast Walk<br>(avg. 103 m min <sup>-1</sup> ) | 4.42<br>(0.95)  | 5.58<br>(0.66)*                 | 4.92<br>(0.53)*                   | 4.71<br>(0.52)          | 5.36<br>(0.50)*             | 5.43<br>(0.68)*                  | 5.02<br>(0.68)*                  | 5.51<br>(0.60)*                | 4.25<br>(0.31)           | 4.40<br>(0.35)                   |
| Stationary Cycling<br>(avg. 99 watts)        | 6.13<br>(1.53)  | 1.99<br>(0.65)*                 | 2.05<br>(0.52)*                   | 1.94<br>(0.56)*         | 2.66<br>(0.49)*             | 1.71<br>(0.67)*                  | 1.32<br>(0.67)*                  | 2.24<br>(0.59)*                | 2.58<br>(0.30)*          | 2.68<br>(0.23)*                  |
| Lawn Mowing                                  | 6.14<br>(0.76)  | 3.42<br>(0.61)*                 | 3.19<br>(0.49)*                   | 3.02<br>(0.48)*         | 3.74<br>(0.46)*             | 3.19<br>(0.63)*                  | 2.80<br>(0.62)*                  | 3.54<br>(0.55)*                | 3.24<br>(0.28)*          | 3.36<br>(0.26)*                  |
| Ascending/Descending<br>Stairs               | 6.40<br>(0.77)  | 4.05<br>(0.53)*                 | 3.70<br>(0.42)*                   | 3.53<br>(0.40)*         | 4.21<br>(0.40)*             | 3.84<br>(0.55)*                  | 3.44<br>(0.55)*                  | 4.12<br>(0.48)*                | 3.53<br>(0.25)*          | 3.64<br>(0.31)*                  |
| Racquetball                                  | 6.81<br>(1.38)  | 4.39<br>(0.84)*                 | 3.97<br>(0.67)*                   | 3.82<br>(0.71)*         | 4.47<br>(0.63)*             | 4.20<br>(0.87)*                  | 3.80<br>(0.86)*                  | 4.43<br>(0.77)*                | 3.70<br>(0.39)*          | 3.84<br>(0.47)*                  |
| Basketball                                   | 7.94<br>(1.05)  | 5.97<br>(0.90)*                 | 5.24<br>(0.72)*                   | 5.04<br>(0.73)*         | 5.66<br>(0.68)*             | 5.84<br>(0.93)*                  | 5.42<br>(0.93)*                  | 5.87<br>(0.82)*                | 4.43<br>(0.42)*          | 4.58<br>(0.48)*                  |
| Slow Run<br>(avg. 159 m min <sup>-1</sup> )  | 8.65<br>(1.32)  | 8.49<br>(1.20)                  | 7.26<br>(0.96)*                   | 6.98<br>(1.01)*         | 7.56<br>(0.91)*             | 8.46<br>(1.25)                   | 8.03<br>(1.24)                   | 8.18<br>(1.10)                 | 5.60<br>(0.56)*          | 5.76<br>(0.58)*                  |
| Fast Run<br>(avg. 189 m min <sup>-1</sup> )  | 10.25<br>(1.74) | 9.08<br>(1.98)*                 | 7.73<br>(1.59)*                   | 7.46<br>(1.73)*         | 8.01<br>(1.50)*             | 9.06<br>(2.06)*                  | 8.63<br>(2.05)*                  | 8.72<br>(1.81)*                | 5.88<br>(0.92)*          | 6.03<br>(0.95)*                  |
| Average for all<br>activities                | 4.51<br>(2.85)  | 3.50<br>(2.47)*                 | 3.26<br>(1.98)*                   | 3.11<br>(1.94)*         | 3.80<br>(1.87)*             | 3.28<br>(2.57)*                  | 2.88<br>(2.55)*                  | 3.62<br>(2.26)*                | 3.28<br>(1.15)*          | 3.40<br>(1.18)*                  |

\* Significantly different from Cosmed K4b<sup>2</sup> (P < 0.05); avg. = average; TM = treadmill; OG = over-ground; BM = body mass

Supplemental table 4. Relationship between each prediction equation and the Cosmed K4b<sup>2</sup> for the estimation of energy expenditure for 18 different activities. All prediction equation had a significant relationship (P < 0.001)

| Prediction Equation                            | Beta   | Slope | R <sup>2</sup> | Standard Error of the Estimate |
|------------------------------------------------|--------|-------|----------------|--------------------------------|
| Actical 2-regression equation                  | 1.112  | 0.993 | 0.719          | 1.535                          |
| Actical single regression equation             | 1.185  | 0.971 | 0.717          | 1.539                          |
| Actigraph Nichols equation                     | 0.812  | 1.026 | 0.656          | 1.695                          |
| Actigraph Freedson MET equation                | 1.238  | 0.939 | 0.656          | 1.695                          |
| Actigraph Swartz lifestyle equation            | -0.245 | 1.088 | 0.656          | 1.695                          |
| Actigraph Yngve OG walk/run equation           | 1.905  | 0.910 | 0.656          | 1.695                          |
| Actigraph Yngve TM walk run equation           | 1.561  | 0.905 | 0.656          | 1.695                          |
| Actigraph Hendelman walk equation              | 0.715  | 1.170 | 0.656          | 1.695                          |
| Actigraph Hendelman lifestyle equation         | -2.744 | 1.825 | 0.656          | 1.695                          |
| Actigraph Leenders equation                    | -0.198 | 1.244 | 0.656          | 1.695                          |
| Actigraph Brooks MET OG walk equation          | -2.091 | 2.017 | 0.656          | 1.695                          |
| Actigraph Brooks MET OG walk with BM equation  | -2.149 | 1.957 | 0.652          | 1.707                          |
| Actigraph Heil equation                        | 0.837  | 1.188 | 0.648          | 1.715                          |
| Actigraph Brooks kcal OG walk with BM equation | -1.564 | 1.787 | 0.625          | 1.771                          |
| Actigraph Freedson kcal equation               | 1.656  | 0.752 | 0.530          | 1.983                          |
| AMP-331                                        | 0.420  | 1.491 | 0.511          | 2.026                          |
| Actigraph Brooks kcal OG walk equation         | -0.858 | 1.441 | 0.436          | 2.173                          |

TM, treadmill; OG, over-ground; BM, body mass; \*significant (P < 0.001).
